# Supplementary material
Source: PubMed Central journal article supplement (PMC514155)
Supplement: plntcell_tpc.022087_1.pdf [file plntcell_tpc.022087_1.pdf]

## SUPPLEMENTAL DATA

Genes are listed in the order as shown in the Tables. For the seven genes that were analyzed for both hybrids S1/NS1 and S2/NS2, sequences of S1 and NS1 are listed first followed by those of S2 and NS2 if different from S1 and NS1. If allele sequences of the PCR fragments are the same between the two sets of inbred parents, only S1 and NS1 are listed. PCR primers are highlighted in yellow. PCR primers of S2 and NS2 are the same as those for S1 and NS1 for all 15 genes. Shaded areas are conserved regions between the two alleles. Allelic sequence polymorphisms (SNPS or InDels) are in bold face.

|                |       |                                                                            |                      |
|----------------|-------|----------------------------------------------------------------------------|----------------------|
|                |       | 1                                                                          | 50                   |
| NS1 <i>LTP</i> | (1)   | TGTGTCATGCATCAGACTGGCACATAATAA                                             | AGAAGTAGATCATGCACCCA |
| S1 <i>LTP</i>  | (1)   | TGTGTCATGCATCAGACTGGCACATAATAA                                             | AGAAGTAGATCATGCACCCA |
| Consensus      | (1)   | TGTGTCATGCATCAGACTGGCACATAATAA                                             | AGAAGTAGATCATGCACCCA |
|                |       | 51                                                                         | 100                  |
| NS1 <i>LTP</i> | (51)  | CTAGTGATCACTTCGTCTAGTGCCCTCCGTTCAATGTC                                     | CGTCGTCGTCGT         |
| S1 <i>LTP</i>  | (51)  | CTAGTGATCACTTCGTCTAGTGCCCTCCGTTCAATGTC                                     | CGTCGTCGTCGT         |
| Consensus      | (51)  | CTAGTGATCACTTCGTCTAGTGCCCTCCGTTCAATGTC                                     | CGTCGTCGTCGT         |
|                |       | 101                                                                        | 150                  |
| NS1 <i>LTP</i> | (101) | CGT-----GTACCT--TACGTGACATGCTGTAGCACGTACGCTAGCAGA                          |                      |
| S1 <i>LTP</i>  | (101) | CGT <b>CGTGGT</b> GTACCTCGTACGTGACATGCCGTAGCACGTACGCTAGCAGA                |                      |
| Consensus      | (101) | CGT GTACCT TACGTGACATGC GTAGCACGTACGCTAGCAGA                               |                      |
|                |       | 151                                                                        | 176                  |
| NS1 <i>LTP</i> | (143) | <b>GCAGCACCTCAATGTCCTTGGGTTTG</b>                                          |                      |
| S1 <i>LTP</i>  | (151) | <b>GCAGCACCTCAATGTCCTTGGGTTTG</b>                                          |                      |
| Consensus      | (151) | GCAGCACCTCAATGTCCTTGGGTTTG                                                 |                      |
|                |       | 1                                                                          | 50                   |
| NS2 <i>LTP</i> | (1)   | TGTGTCATGCATCAGACTGGCACATAATAA                                             | AGAAGTAGATCATGCACCCA |
| S2 <i>LTP</i>  | (1)   | TGTGTCATGCATCAGACTGGCACATAATAA                                             | AGAAGTAGATCATGCACCCA |
| Consensus      | (1)   | TGTGTCATGCATCAGACTGGCACATAATAA                                             | AGAAGTAGATCATGCACCCA |
|                |       | 51                                                                         | 100                  |
| NS2 <i>LTP</i> | (51)  | CTAGTGATCACTTCGTCTAGTGCCCTCCGTT <b>CGCTGTTGTCGT</b> CGTCGT                 |                      |
| S2 <i>LTP</i>  | (51)  | CTAGTGATCACTTCGTCTAGTGCCCTCCGTT <b>CAATGT</b> -----CGTCGT                  |                      |
| Consensus      | (51)  | CTAGTGATCACTTCGTCTAGTGCCCTCCGTTCAATGT                                      | CGTCGT               |
|                |       | 101                                                                        | 150                  |
| NS2 <i>LTP</i> | (101) | CGTCGTGGTGTACCTCGTACGTGACATGCCGTAGCACGTACGCTAGCAGA                         |                      |
| S2 <i>LTP</i>  | (95)  | CGTCGT <b>CGTGTACCT</b> --TACGTGACATGCTGTAGCACGTACGCTAGCAGA                |                      |
| Consensus      | (101) | CGTCGT GTGTACCT TACGTGACATGC GTAGCACGTACGCTAGCAGA                          |                      |
|                |       | 151                                                                        | 176                  |
| NS2 <i>LTP</i> | (151) | <b>GCAGCACCTCAATGTCCTTGGGTTTG</b>                                          |                      |
| S2 <i>LTP</i>  | (143) | <b>GCAGCACCTCAATGTCCTTGGGTTTG</b>                                          |                      |
| Consensus      | (151) | GCAGCACCTCAATGTCCTTGGGTTTG                                                 |                      |
|                |       | 1                                                                          | 50                   |
| NS1 <i>GGT</i> | (1)   | <b>GGCCACAGCCAATGC</b> GAGAATACAAGTCCAAGATTATGGTATCCCAACAT                 |                      |
| S1 <i>GGT</i>  | (1)   | <b>GGCCACAGCCAATGC</b> TAGAATACAAGTCCAAGATTATGGTATCCCAACAT                 |                      |
| Consensus      | (1)   | GGCCACAGCCAATGC AGAATACAAGTCCAAGATTATGGTATCCCAACAT                         |                      |
|                |       | 51                                                                         | 100                  |
| NS1 <i>GGT</i> | (51)  | GTTCCCTGT-----AAATGATCCCCCTCAGCTATTCTCCGTCGA                               |                      |
| S1 <i>GGT</i>  | (51)  | GTTCCCTGT <b>TTCCATGTAAAA</b> ATGAT-CCCCCTCAGCTATTCTCCGTCGA                |                      |
| Consensus      | (51)  | GTTCCCTGT AA TGAT CCCCCTCAGCTATTCTCCGTCGA                                  |                      |
|                |       | 101                                                                        |                      |
| NS1 <i>GGT</i> | (91)  | <b>AT</b>                                                                  |                      |
| S1 <i>GGT</i>  | (100) | <b>AT</b>                                                                  |                      |
| Consensus      | (101) | AT                                                                         |                      |
|                |       | 1                                                                          | 50                   |
| NS1 <i>GAB</i> | (1)   | <b>GCCACACCTACGACGAGT</b> ACATCTGGGCGTCGGTTGGGCTGTACCTCGAC                 |                      |
| S1 <i>GAB</i>  | (1)   | <b>GCCACACCTACGACGAGT</b> ACATCTGGGCGTCGGTTGGGCTGTACCTCGAC                 |                      |
| Consensus      | (1)   | GCCACACCTACGACGAGTACATCTGGGCGTCGGTTGGGCTGTACCTCGAC                         |                      |
|                |       | 51                                                                         | 100                  |
| NS1 <i>GAB</i> | (51)  | ATCCTGAACCTGTTCCCTCTCCATCCTGAACATGCTCAGGAGCATGCAATC                        |                      |
| S1 <i>GAB</i>  | (51)  | ATCCTGAACCTGTTCCCTCTCCATCCTGAACATGCTCAGGAGCATGCAATC                        |                      |
| Consensus      | (51)  | ATCCTGAACCTGTTCCCTCTCCATCCTGAACATGCTCAGGAGCATGCAATC                        |                      |
|                |       | 101                                                                        | 150                  |
| NS1 <i>GAB</i> | (101) | <b>CGACA</b> ACTAGCC <b>GGTCAAAGCACCGCACCGGCC</b> TCTTGA <b>TA</b> TCGAACA |                      |

S1 GAB (101) CGACAACCTAGCC-----TCTTGA--TCGAACA  
 Consensus (101) CGACAACCTAGCC TCTTGA TCGAACA  
 151 194  
 NS1 GAB (151) CGGTATACCCCC-----GCGGTCTGTGCTCTGGTTGTTA  
 S1 GAB (126) CGGTATACCCCCATGGTAAATGCGGTCTGTGCTCTGGTTGTTA  
 Consensus (151) CGGTATACCCCC GCGGTCTGTGCTCTGGTTGTTA

1 50  
 NS1 AP2 (1) TACAACCTCCTGGACACAGCTAGCTAGCTGATTTTACAACATACAT---AC  
 S1 AP2 (1) TACAACCTCCTGGACACAGCTAGCTAGCTGATTTTACAACATACATCATAC  
 Consensus (1) TACAACCTCCTGGACACAGCTAGCTAGCTGATTTTACAACATACAT AC  
 51 100  
 NS1 AP2 (48) GGAGTACTACTGCTTGACAAGCATCTCCTTACATCACACCGTGCTGCTC  
 S1 AP2 (51) GGAGTACTACTGCTTGACAAGCATCTCCTTACATCACACCGTGCTGCTC  
 Consensus (51) GGAGTACTACTGCTTGACAAGCATCTCCTTACATCACACCGTGCTGCTC  
 101  
 NS1 AP2 (98) TTTACAA  
 S1 AP2 (100) TTTACAA  
 Consensus (101) TTTACAA

1 50  
 NS1 Histone H2B (1) CGCGAGATCCAGACCTCCGTGCGCCTCGTCTCCAGGAGAGCTCGCCAA  
 S1 Histone H2B (1) CGCGAGATCCAGACCTCCGTGCGCCTCGTCTCCAGGAGAGCTCGCCAA  
 Consensus (1) CGCGAGATCCAGACCTCCGTGCGCCTCGTCTCCAGGAGAGCTCGCCAA  
 51 100  
 NS1 Histone H2B (51) ACACGCCGTCTCCGAGGGAACCAAGGCCGTACCAAGTTCACCAGCAATT  
 S1 Histone H2B (51) ACATGCCGTCTCCGAGGGAACCAAGGCCGTACCAAGTTCACCAGCAATT  
 Consensus (51) ACA GCCGTCTCCGAGGGAACCAAGGCCGTACCAAGTTCACCAGCAATT  
 101 150  
 NS1 Histone H2B (101) GAGCAGCCTCCAGCGTCCACGGATTGTTAGGTCTCCCCTTCTTACAAGG  
 S1 Histone H2B (101) GAGCAGCCTCCAGCGTCCACGGATTGTTAGGTCTCCCCTTCTTACAAGG  
 Consensus (101) GAGCAGCCTCCAGCGTCCACGGATTGTTAGGTCTCCCCTTCTTACAAGG  
 151 200  
 NS1 Histone H2B (151) GTTCTTCGTGCTGCTCTACCCCTCCCTCCCGCTATGTATGTGCTG  
 S1 Histone H2B (151) GTTCTTCGTGCTGCTCTACCCCTC-----CCCGCTATGTATGTGCTG  
 Consensus (151) GTTCTTCGTGCTGCTCTACCCCTC CCCGCTATGTATGTGCTG  
 201 223  
 NS1 Histone H2B (201) TGAATCGTTGATGTTCTCGTCTG  
 S1 Histone H2B (196) TGAATCGTTGATGTTCTCGTCTG  
 Consensus (201) TGAATCGTTGATGTTCTCGTCTG

1 50  
 NS1 ARDA (1) GACGGCGGCAGCTACAAGCGGGCGCAGTCGACGCCGTGACCCCGACGAC  
 S1 ARDA (1) GACGGCGGCAGCTACAAGCGGGCGCAGTCGATGCCGTGACCCCGACGAC  
 Consensus (1) GACGGCGGCAGCTACAAGCGGGCGCAGTCGACGCCGTGACCCCGACGAC  
 51 100  
 NS1 ARDA (51) GCCGGTGACGCCGTGCTGCTG-----ACGACGCCGCGCGGCGCGG  
 S1 ARDA (51) GCCGGTGACGCCGTGCTGCTGCTGCTGCTGCTGACGACGCCGCGCGGCGCGG  
 Consensus (51) GCCGGTGACGCCGTGCTGCTGCTG ACGACGCCGCGCGGCGCGG  
 101 123  
 NS1 ARDA (92) GCAACGTGTGGCGCAGCGTCTTC  
 S1 ARDA (101) GCAACGTGTGGCGCAGCGTCTTC  
 Consensus (101) GCAACGTGTGGCGCAGCGTCTTC

1 50  
 NS1 PRP (1) GGGCCAACGTCTGGGCATCAACCTCAACCTGCCATCAACCTCAGCCTC  
 S1 PRP (1) GGGCCAACGTCTGGGCATCAACCTCAACCTGCCATCAACCTCAGCCTC  
 Consensus (1) GGGCCAACGTCTGGGCATCAACCTCAACCTGCCATCAACCTCAGCCTC  
 51 100  
 NS1 PRP (51) CTCGTCAACTACTGCGGCAGGCGCGTCCCCTCGGGCTTCCAGTGCTTCTG  
 S1 PRP (51) CTCGTCAACTACTGCGGCAGGCGCGTCCCCTCGGGCTTCCAGTGCTTCTG  
 Consensus (51) CTCGTCAACTACTGCGGCAGGCGCGTCCCCTCGGGCTTCCAGTGCTTCTG  
 101 121  
 NS1 PRP (101) ACTATCACACGCCCATCGATC  
 S1 PRP (101) AT-----CACGCCCATCGATC  
 Consensus (101) A CACGCCCATCGATC

1 50  
 NS1 Histone H4 (1) CCGTCACCTACACCGAGCACGCGCGCCGTAAGACCGTCACCGCCATGGAC  
 S1 Histone H4 (1) CCGTCACCTACACCGAGCACGCGCGCCGTAAGACCGTCACCGCCATGGAC  
 Consensus (1) CCGTCACCTACACCGAGCACGCGCGCCGTAAGACCGTCACCGCCATGGAC

51 100

NS1 *Histone H4* (51) GTCGTCTACGCGCTTAAGCGCCAGGGCCGCACCCTCTACGGCTTCGGCGG  
 S1 *Histone H4* (51) GTCGTCTACGCGCTTAAGCGCCAGGGCCGCACCCTCTACGGCTTCGGCGG  
 Consensus (51) GTCGTCTACGCGCTTAAGCGCCAGGGCCGCACCCTCTACGGCTTCGGCGG  
 101 150

NS1 *Histone H4* (101) CTAGGCTGCCCAGCGCGCTTCGCCGTCGCTGCGGTTCTGGTGTGCTG  
 S1 *Histone H4* (101) CTAGGCTGCCCAGCGCGCTTCGCCGTCGCTGCGGTTCTGGTGTGCTG  
 Consensus (101) CTAGG CTGCCGCGCCGCGCTTCGCCGTCGCTGCGGTTCTGGTGTGCTG  
 151 200

NS1 *Histone H4* (151) CAGTTCGCAAGTTGTTTGTGTGGG**GAAAAAATGCTAGCTACTGTTAGAAC**  
 S1 *Histone H4* (151) CAGTTCGCAAGTTGTTTGTGTGGG**CGAAAAAATGCTAGATACTGTTAGAAC**  
 Consensus (151) CAGTTCGCAAGTTGTTTGTGTGGG AAAAAATGCTAG TACTGTAGAAC  
 201 213

NS1 *Histone H4* (201) **TGCAGTGCGGTAT**  
 S1 *Histone H4* (201) **TGCAGTGCGGTAT**  
 Consensus (201) TGCAGTGCGGTAT

1 50

NS1 *ZmPIP1-3* (1) **CCGTTCAAGAGCAGGTC**TTAAGCTGCCGCGG**GT**GTGCTGAGACATGCATG  
 S1 *ZmPIP1-3* (1) **CCGTTCAAGAGCAGGTC**TTAAGCTGCCGCGG**CCGTGCCGAGACATGCCTG**  
 Consensus (1) CCGTTCAAGAGCAGGTC**T**TAAGCTGCCGCGG GTGC GAGACATGC TG  
 51 100

NS1 *ZmPIP1-3* (51) **CCAGTCCGGAAGGACGAGCGTCTTCCTGTGGGGGGGAATGCCTTGCTCTGC**  
 S1 *ZmPIP1-3* (51) **CCAGTCCGGAAGGACGAGCGTCTTCCTGTGGG---GAATGCCCT-TCTGC**  
 Consensus (51) CCAGT CGGAAGGACGAGCGTCTTCCTGTGGG GAATGCC T TCTGC  
 101 145

NS1 *ZmPIP1-3* (101) **CCACGCCTAGTTTCTCTGCTGAATCTTCCATCTCTCTTCCCTTCA**  
 S1 *ZmPIP1-3* (97) **CCACGCCTAGTTTCTCTGCTGAATCTTCCATCTCTCTTCCCTTCA**  
 Consensus (101) CCACGCCTAGTTTCTCTGCTGAATCTTCCATCTCTCTTCCCTTCA

1 50

NS1 *Ribo-S29* (1) **GCAAACGCCAAGGACATT**GGCTTCATCAAGTACCGCTGAAGTCAGCTGGGC  
 S1 *Ribo-S29* (1) **GCAAACGCCAAGGACATT**GGCTTCATCAAGTACCGCTGAAGTCAGCTGGGC  
 Consensus (1) GCAAACGCCAAGGACATTGGCTTCATCAAGTACCGCTGAAGTCAGCTGGGC  
 51 100

NS1 *Ribo-S29* (51) GGGCTATCTGAATGCCATCTCTT**GGACATGG**GACAGTGTAGTAGAGGCGAT  
 S1 *Ribo-S29* (51) GGGCTATCTGAATGCCATCTCTT**G-----GACAGTGTAGTAGAGGCGAT**  
 Consensus (51) GGGCTATCTGAATGCCATCTCTT GACAGTGTAGTAGAGGCGAT  
 101 150

NS1 *Ribo-S29* (101) GCCACAATTTAATTACTGTCATTTAGATGTTCC**GTTTCAGAACTCTGCTA**  
 S1 *Ribo-S29* (95) GCCACAATTTAATTACTGTCATTTAGATGTTCC**CTTCAGAACTCTGCTA**  
 Consensus (101) GCCACAATTTAATTACTGTCATTTAGATGTTCC TTCAGAACTCTGCTA  
 151 161

NS1 *Ribo-S29* (151) **TTTAAGTCCGC**  
 S1 *Ribo-S29* (145) **TTTAAGTCCGC**  
 Consensus (151) TTTAAGTCCGC

1 50

NS1 *UCR* (1) **CCTGCTGTGCTGTTATA**TTGTTTCTTCCATGACAGTTGGCTAGTGTTT  
 S1 *UCR* (1) **CCTGCTGTGCTGTTATA**TTGTTTCTTCCATGACAGTTGGCTAGTGTTT  
 Consensus (1) CCTGCTGTGCTGTTATA**T**TTTCTTCCATGACAGTTGGCTAGTGTTT  
 51 100

NS1 *UCR* (51) **TTTTT--GCTCCACGAGGATCATTGCAATTCCTTGATGGTTCGACTGTTAT**  
 S1 *UCR* (51) **TTTTTTTGCCCCACAAGGATCATTGCAATTCCTTAATGGCCGACGGTTAA**  
 Consensus (51) TTTTT GC CCAC AGGATCATTGCAATTCCTT ATGG CGAC GTTA  
 101 113

NS1 *UCR* (99) **ATGCCAAAGTGCG**  
 S1 *UCR* (101) **ATGCCAAAGTGCG**  
 Consensus (101) ATGCCAAAGTGCG

1 50

NS1 *PGS* (1) **GTTGAAAATGTAGGGAA**ACTCTTGTTTTCACTAAAAAGGAACCCCTGGAG  
 S1 *PGS* (1) **GTTGAAAATGTAGGGAA**ACTCTTGTTTTCACTAAAAAGGAACCCCTGGAG  
 Consensus (1) GTTGAAAATGTAGGGAAACTCTTGTTTTCACTAAAAAGGAACCCCTGGAG  
 51 100

NS1 *PGS* (51) **GGGGGAGTAACGGTGTAGAAGTTTTATGTTGTCACAGTTGGCATGCATT**  
 S1 *PGS* (51) **GGGGG-AGTAACGGTGTAGAAGTTTTATGTTGTCACAGTTGGCATGCATT**  
 Consensus (51) GGGGG AGTAACGGTGTAGAAGTTTTATGTTGTCACAGTTGGCATGCATT  
 101 128

NS1 *PGS* (101) **CAT---ATAGGAATAGCTAGGAGATGGC**  
 S1 *PGS* (100) **CATCATATAGGAATAGCTAGGAGATGGC**

Consensus (101) CAT ATAGGAATAGCTAGGAGATGGC

1 50  
NS1 *Ribo-S4* (1) GCTGCTGCCAAGGCATAAGTTCTCTGAATGTGCTGCTTGGAGCTTTTGGC  
S1 *Ribo-S4* (1) GCTGCTGCCAAGGCATAAGTTCTCTGAATGTGCTGCTTGGAGCTTTTGGC  
Consensus (1) GCTGCTGCCAAGGCATAAGTTCTCTGAATGTGCTGCTTGGAGCTTTTGGC  
51 100  
NS1 *Ribo-S4* (51) TATGTCTAGTTTAAATTTTTATCTGCAAGGATATAGAGCTACCTTCCCAAG  
S1 *Ribo-S4* (51) TATGTCTAGTTTAAATTTTTATCTGCAAGGATATAGAGCTACCTTCCCAAG  
Consensus (51) TATGTCTAGTTT AAATTTTTATCTGCAAGGATATAGAGCTACCTTCCCAAG  
101 150  
NS1 *Ribo-S4* (101) ACGTTTATCATCATGTTTTGTTGCTTTTGGTTCTTGAACAGCGTTTGCA  
S1 *Ribo-S4* (101) AC--TTTATCATCATGTTTTGTTGCTTTTGGTTCTTGAACAGCGTTTGCA  
Consensus (101) AC TTTATCATCATGTTTTGTTGCTTTTGGTTCTTGAACAGCGTTTGCA  
151  
NS1 *Ribo-S4* (151) GC  
S1 *Ribo-S4* (149) GC  
Consensus (151) GC

1 50  
NS2 *Ribo-S4* (1) GCTGCTGCCAAGGCATAAGTTCTCTGAATGTGCTGCTTGGAGCTTTTGGC  
S2 *Ribo-S4* (1) GCTGCTGCCAAGGCATAAGTTCTCTGAATGTGCTGCTTGGAGCTTTTGGC  
Consensus (1) GCTGCTGCCAAGGCATAAGTTCTCTGAATGTGCTGCTTGGAGCTTTTGGC  
51 100  
NS2 *Ribo-S4* (51) TATGTCTAGTTTAAATTTTTATCTGCAAGGATATAGAGCTACCTTCCCAAG  
S2 *Ribo-S4* (51) TATGTCTAGTTTAAATTTTTATCTGCAAGGATATAGAGCTACCTTCCCAAG  
Consensus (51) TATGTCTAGTTT AAATTTTTATCTGCAAGGATATAGAGCTACCTTCCCAAG  
101 150  
NS2 *Ribo-S4* (101) AC--TTTATCATCATGTTTTGTTGCTTTTGGTTCTTGAACAGCGTTTGCA  
S2 *Ribo-S4* (101) ACGTTTATCATCATGTTTTGTTGCTTTTGGTTCTTGAACAGCGTTTGCA  
Consensus (101) AC TTTATCATCATGTTTTGTTGCTTTTGGTTCTTGAACAGCGTTTGCA  
151  
NS2 *Ribo-S4* (149) GC  
S2 *Ribo-S4* (151) GC  
Consensus (151) GC

1 50  
NS1 *ZmPIP2-1* (1) AGGCGACCCGAACCAACCACCGGCACCCAAGTCGATCGATGA----TGTC  
S1 *ZmPIP2-1* (1) AGGCGACCCGAACCAACCACCGGCACCCAAGTCGATCGATGAATGATGGC  
Consensus (1) AGGCGACCCGAACCAACCACCGGCACCCAAGTCGATCGATGA TG C  
51 95  
NS1 *ZmPIP2-1* (47) ATTCTCCTCGCTCACGACTTCCCCCGCCC GTAGGTCGCCCGCCAT  
S1 *ZmPIP2-1* (51) ATTCTCCTCGCTCACGGC--CCCCCGCCC GTAGGTCGCCCGCCAT  
Consensus (51) ATTCTCCTCGCTCACG C CCCCCGCCGTAGGTCGCCCGCCAT

1 50  
NS1 *MSP* (1) CGGTACCTGTTTTACTACTCT--GTTTGGTGGTTTCTGAGGCAAGTTGCC  
S1 *MSP* (1) CGGTACCTGTTTTACTACTCTCTGTTTGGTGGTTTCTGAGG-AAGTTGCC  
Consensus (1) CGGTACCTGTTTTACTACTCT GTTTGGTGGTTTCTGAGG AAGTTGCC  
51 100  
NS1 *MSP* (49) CGTGTACTTGTATCGTAAAAACCGAGTGGGACATCTGCATCGTTTCATCT  
S1 *MSP* (50) CGTGTACTTGTATCGTAAAAACCGAGTGGGACATCTGCATCGTTTCATCT  
Consensus (51) CGTGTACTTGTATCGTAAAAACCGAGTGGGACATCTGCATCGTTTCATCT  
101  
NS1 *MSP* (99) GC  
S1 *MSP* (100) GC  
Consensus (101) GC
